# Supplementary material for: Orientation-Dependent Indentation Behaviour of Additively Manufactured FeCo Sample: A Quasi In-Situ Study
Source: MDPI journal article supplement (doi:10.3390/magnetism2020007), 2022-03-25
Supplement: s1 [file s1]

# Supplementary Materials: Orientation dependent indentation behaviour of additively manufactured FeCo sample: A quasi *in-situ* study

Sudipta Pramanik, Frederik Tasche, Kay-Peter Hoyer and Mirko Schaper

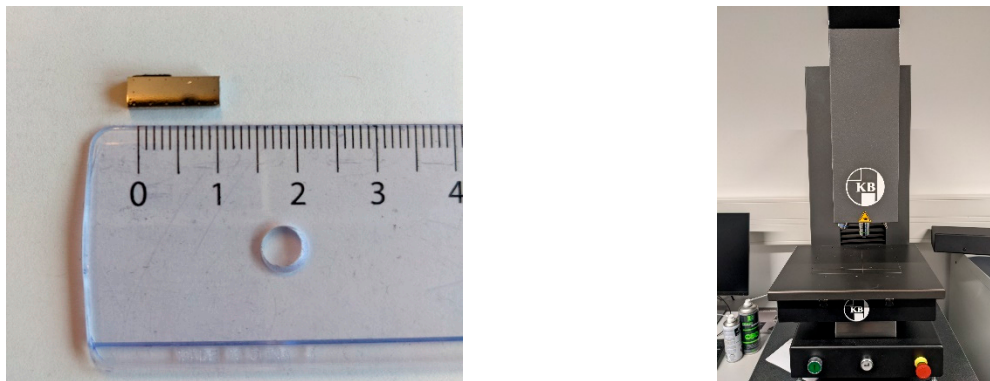

**Figure S1.** (a) Image of the sample and (b) image of the hardness testing machine used for making the indentations.
