# Supplementary material for: Orientation-Dependent Indentation Behaviour of Additively Manufactured FeCo Sample: A Quasi In-Situ Study
Source: MDPI journal article supplement (doi:10.3390/magnetism2020007), 2022-03-25
Supplement: s1 [file s1]

Archive with 1 entries (1 files):
- magnetism-1501418-supplementary.pdf
